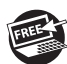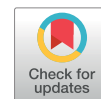

## Issues and Events

### PROFESSIONAL EDUCATION

The American Diabetes Association offers a variety of continuing education opportunities and materials for health care professionals. Educational offerings include live and free online programs. For more information, including a complete list of American Diabetes Association programs, please visit [professional.diabetes.org/ce](http://professional.diabetes.org/ce).

### SCIENTIFIC SESSIONS

The 78th annual American Diabetes Association Scientific Sessions will be held in Orlando, Florida, on 22–26 June 2018, at the Orange County Convention Center. The largest of its kind, this meeting brings together scientists and health care professionals from around the world who are involved in diabetes research and care. Attendees choose from over 3,000 original presentations given by leading experts in the field. For more information, please visit [scientificsessions.diabetes.org](http://scientificsessions.diabetes.org).

### ADVANCED POSTGRADUATE COURSE

The 65th annual American Diabetes Association Advanced Postgraduate Course will be held in San Francisco, California, on 9–11 February 2018. Join your colleagues and diabetes experts for presentations and discussions on cutting-edge clinical research in diabetes. The course will cover the latest clinical research translated into evidence-based treatment strategies to improve outcomes in your patients with diabetes. Discuss clinical cases with world-renowned faculty, and take home practical patient management tools that you can use immediately in your practice. For more information, please visit [professional.diabetes.org/ce](http://professional.diabetes.org/ce).

### 33rd ANNUAL CLINICAL CONFERENCE ON DIABETES

The 33rd Annual Clinical Conference on Diabetes will be held in Naples, Florida, on 24–27 May 2018 at Naples Grande Hotel. It will provide a comprehensive update on the treatment of diabetes, cardiovascular disease, obesity, and comorbidities. The ADA Clinical Conference is developed specifically to provide current clinical information utilizing different teaching methods, including didactic general sessions and small-group, interactive learning opportunities. For more information, please visit [professional.diabetes.org/ce](http://professional.diabetes.org/ce).

### 77th SCIENTIFIC SESSIONS WEBCASTS

Webcasts from the 77th annual American Diabetes Association Scientific Sessions are available. Held in June 2017, this meeting brought together scientists and health care professionals to discuss issues pertaining to diabetes research, care, and education. To access the webcasts, please visit [professional.diabetes.org/webcasts-ss2017](http://professional.diabetes.org/webcasts-ss2017).

### DIABETES CORE UPDATE PODCASTS

*Diabetes Core Update* is a monthly audio podcast devoted to presenting and discussing the latest clinically relevant articles from the American Diabetes Association's scholarly journals. *Diabetes Core Update* audio podcasts are free and can be accessed through iTunes or RSS feed. For more information, please visit [diabetesjournals.org/content/diabetes-core-update-podcasts](http://diabetesjournals.org/content/diabetes-core-update-podcasts).
